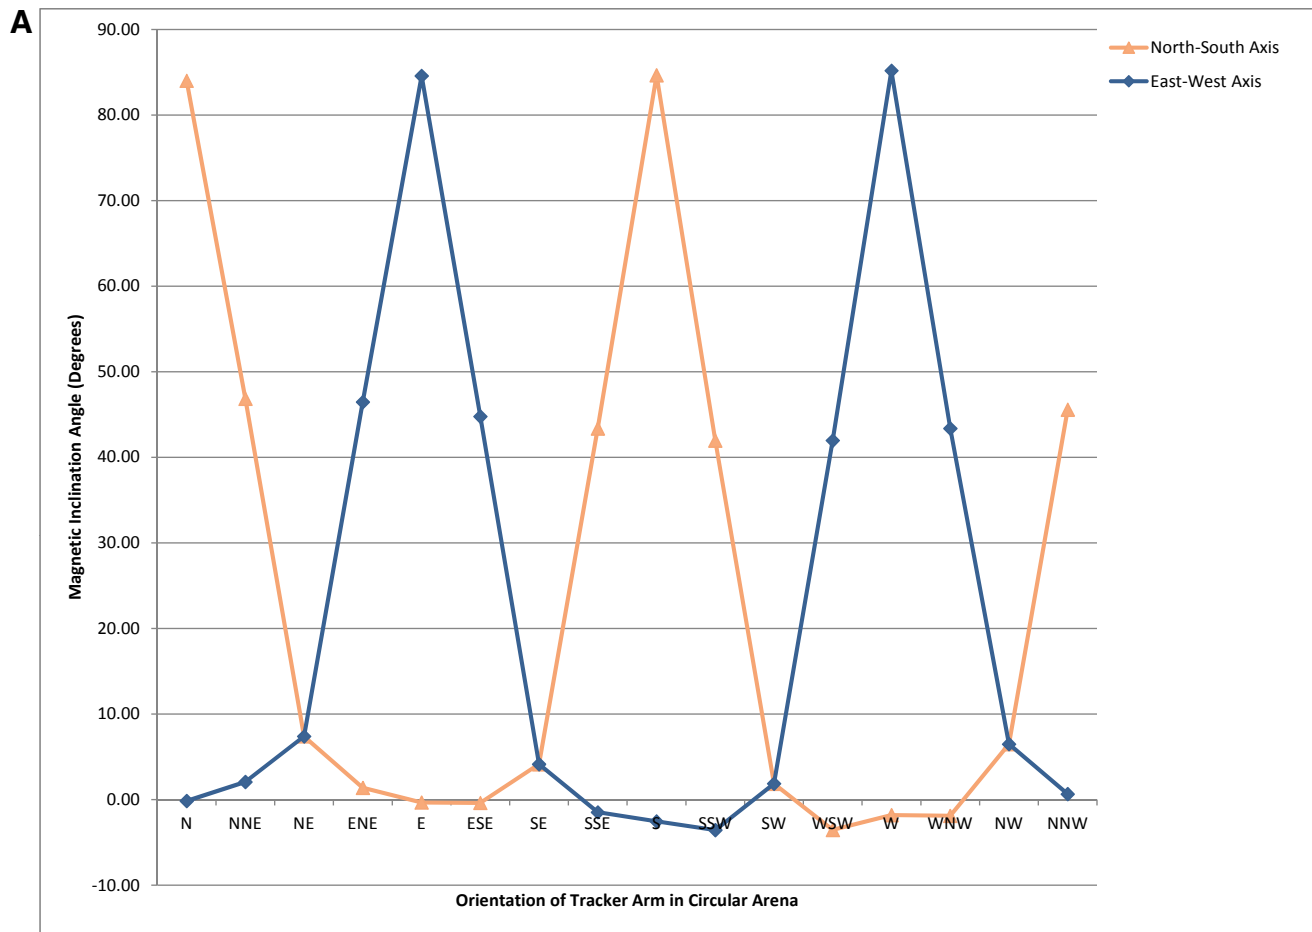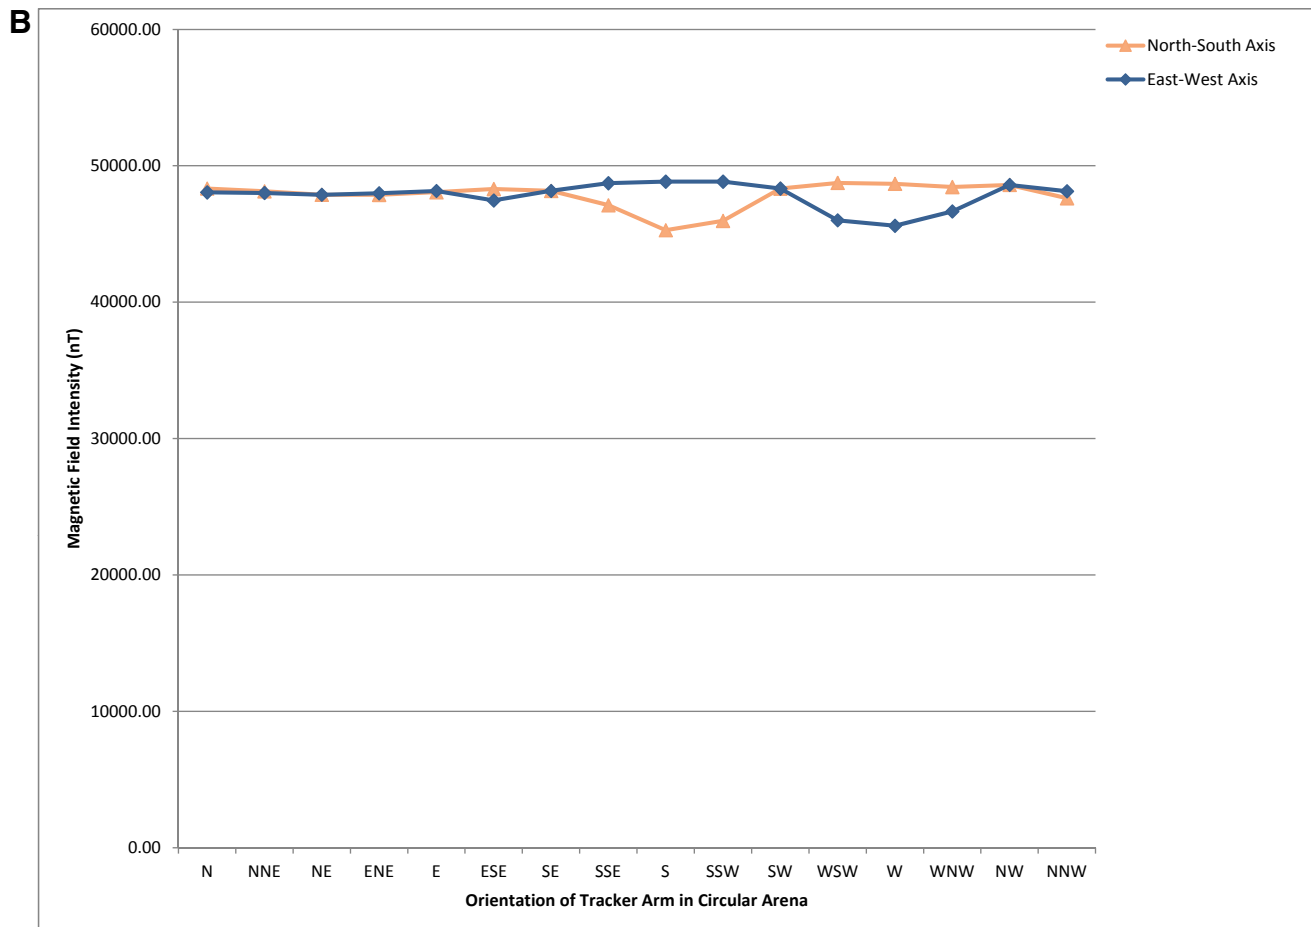

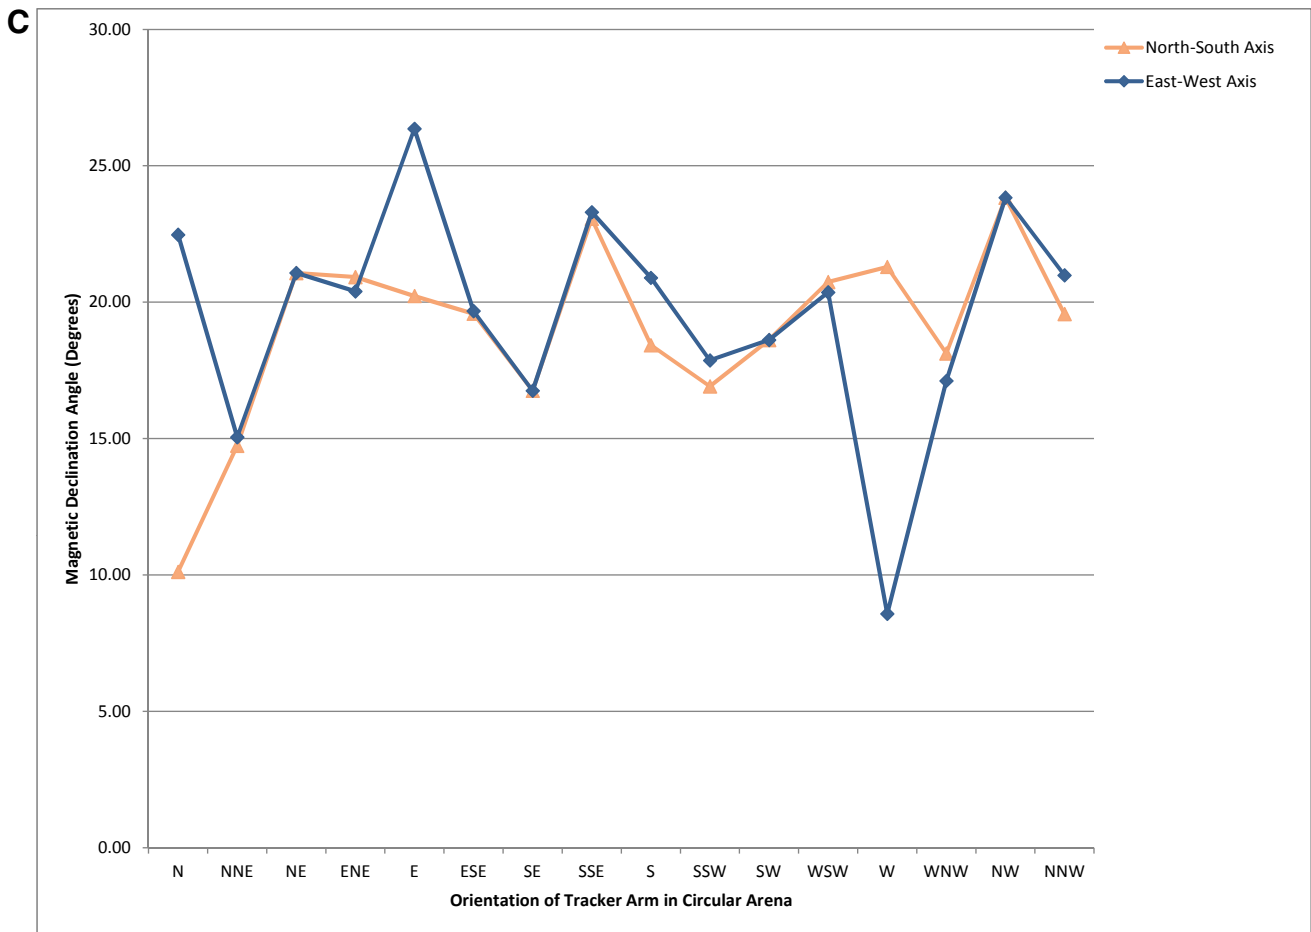

**Fig. S1. Total magnetic field experienced by pigeon at 16 locations around periphery of circular orientation arena during parallel (standard) sessions.** Measurements were taken with a FVM handheld 3-axis vector fluxgate magnetometer (Meda Inc.) at the head height of a walking pigeon and at a distance of 30 cm from the center of the arena. (a) Magnetic inclination angle. (b) Magnetic field intensity. (c) Magnetic declination angle.

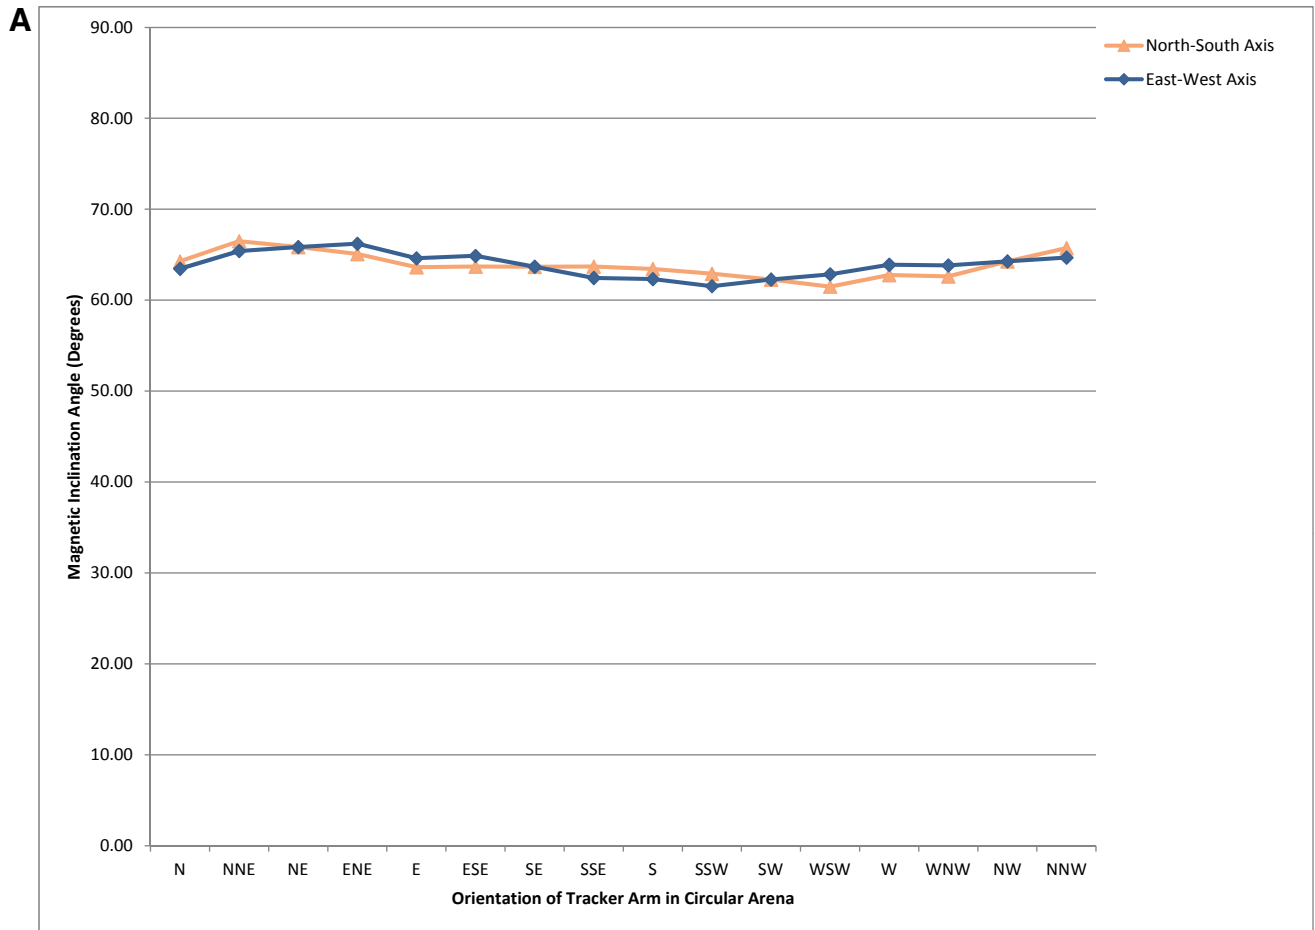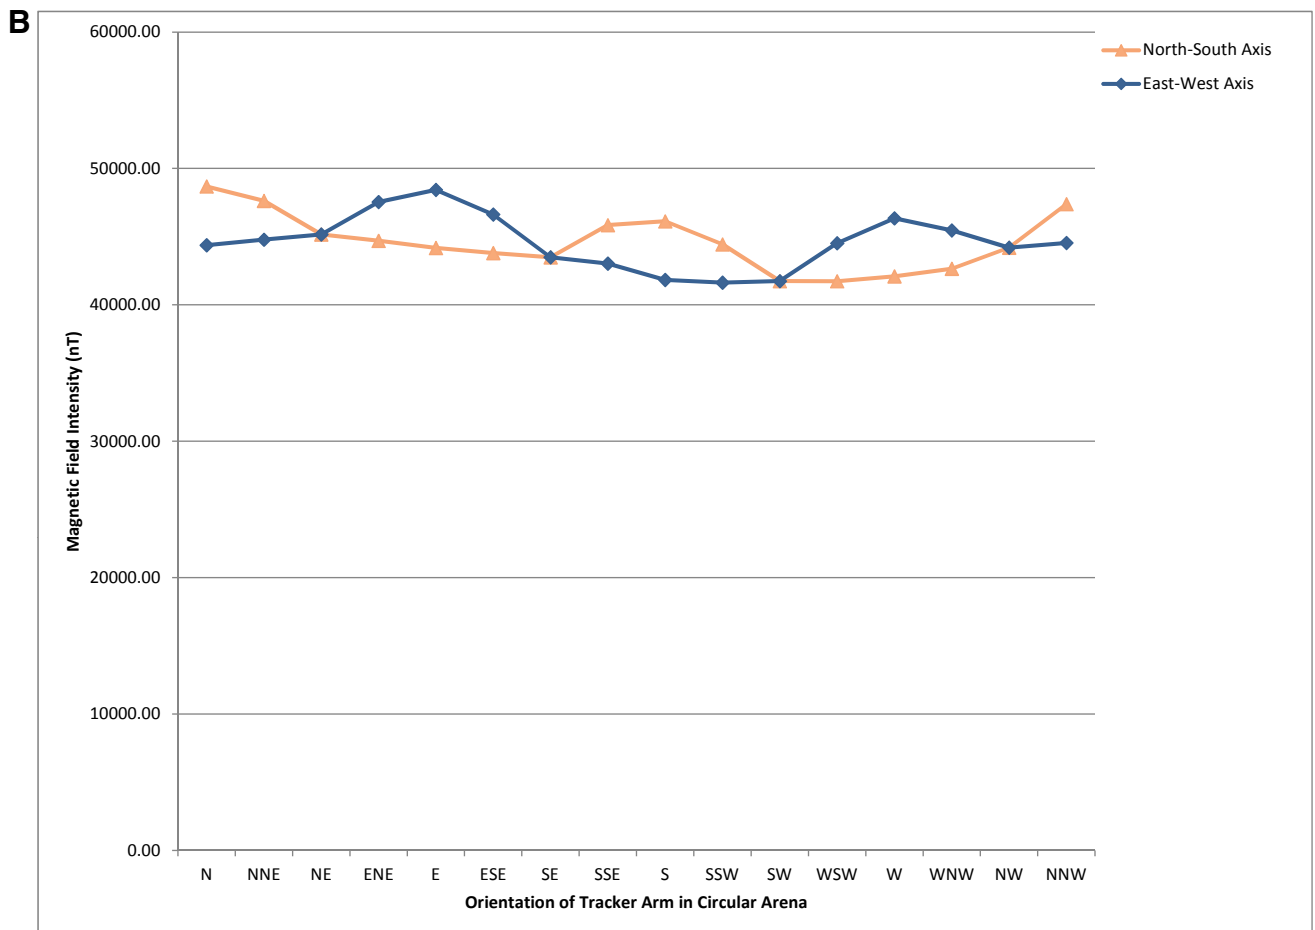

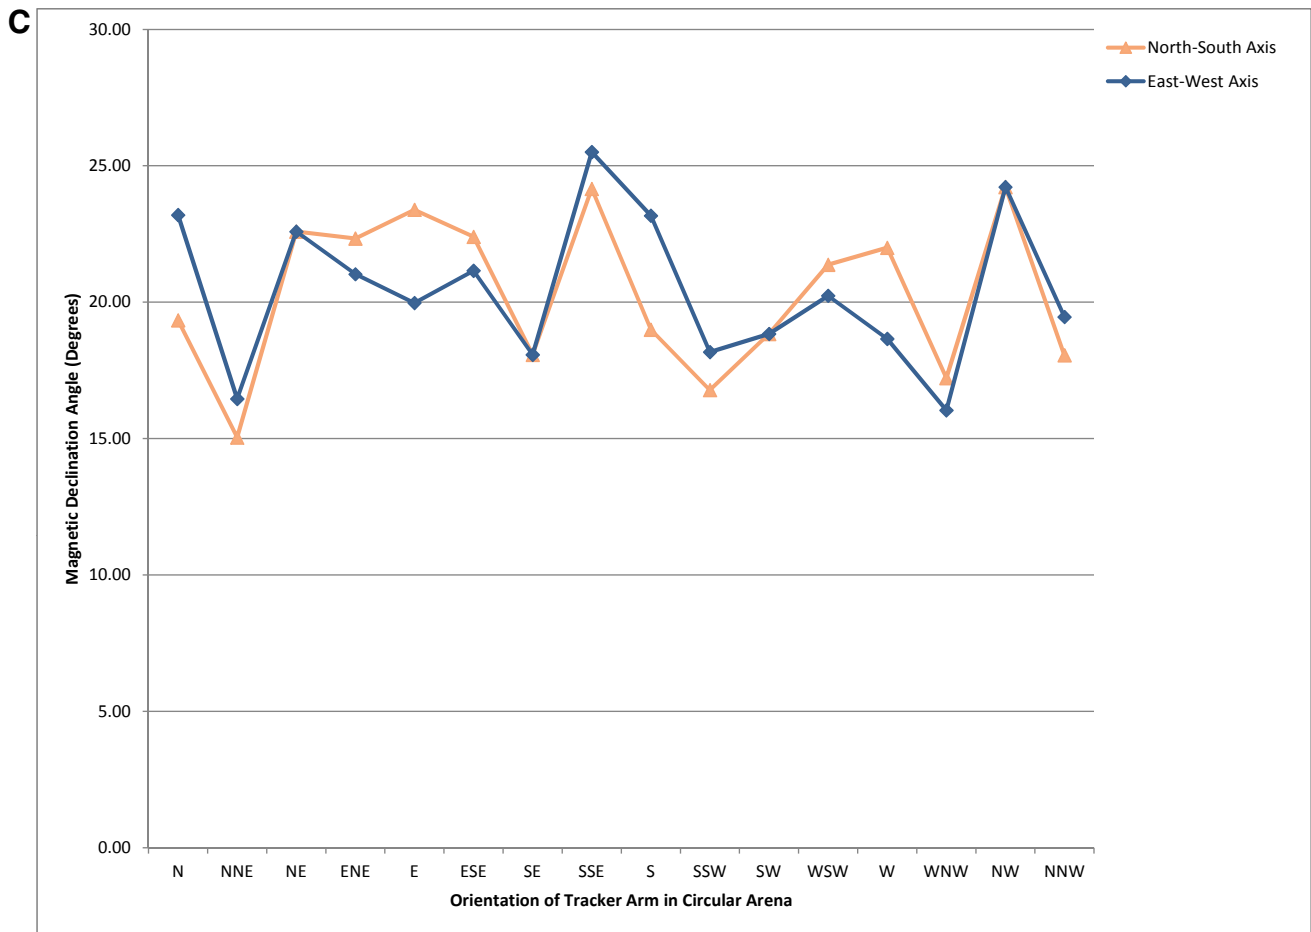

**Fig. S2. Total magnetic field experienced by pigeon at 16 locations around periphery of circular orientation arena during anti-parallel sessions.** Measurements taken as described for Fig. 1a. (a) Magnetic inclination angle. (b) Magnetic field intensity. (c) Magnetic declination angle.

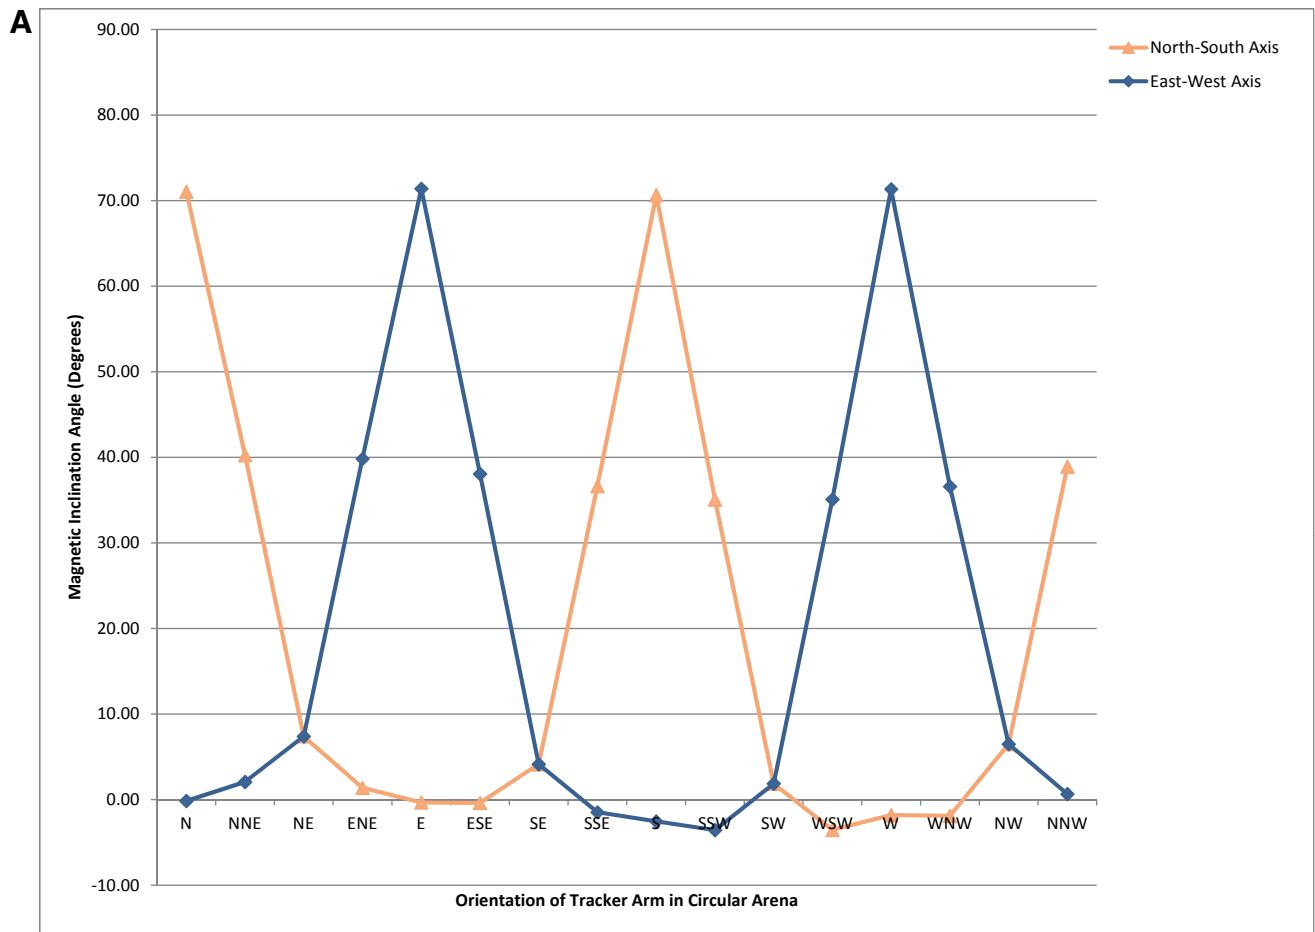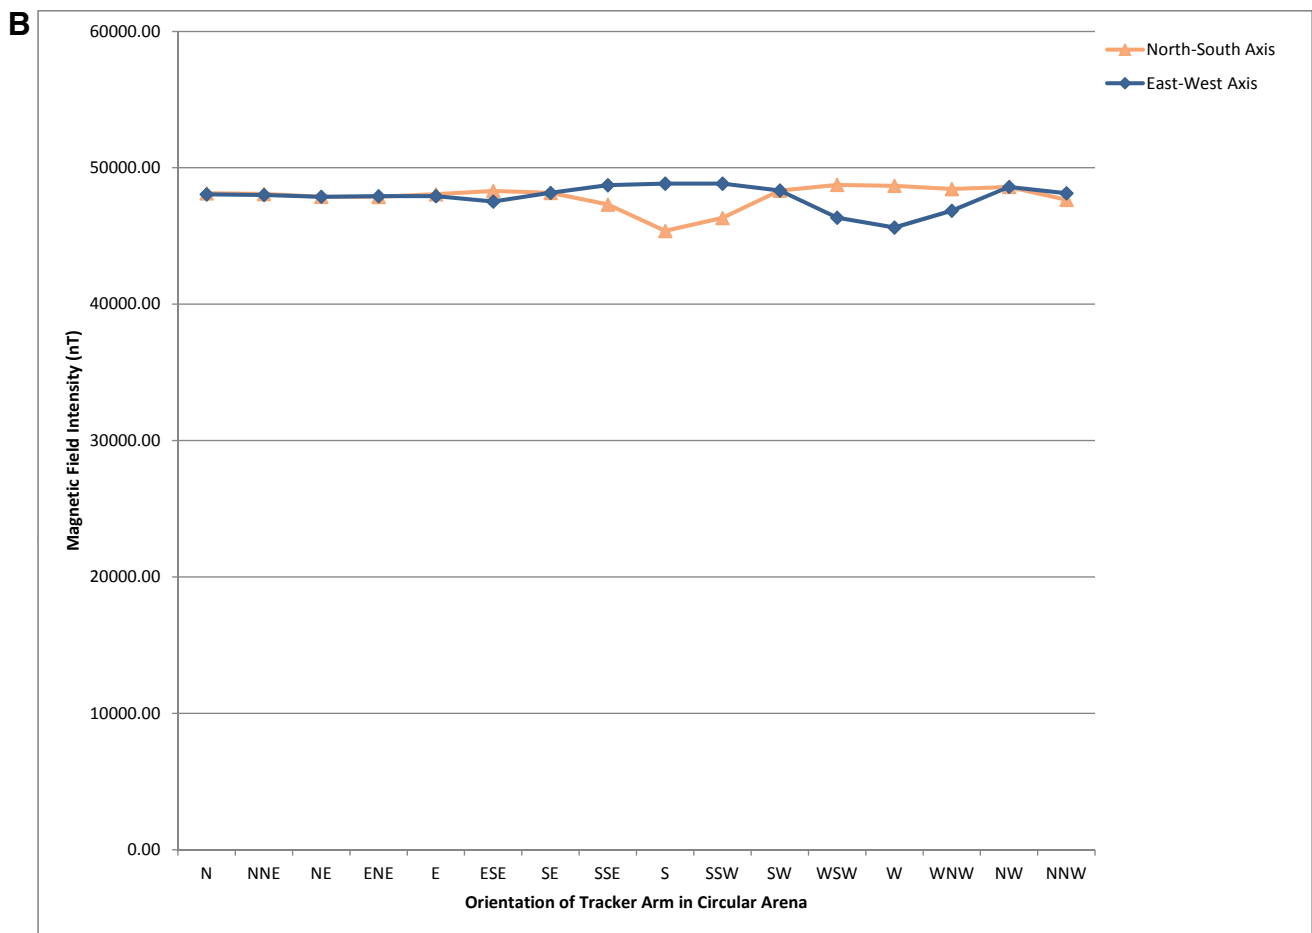

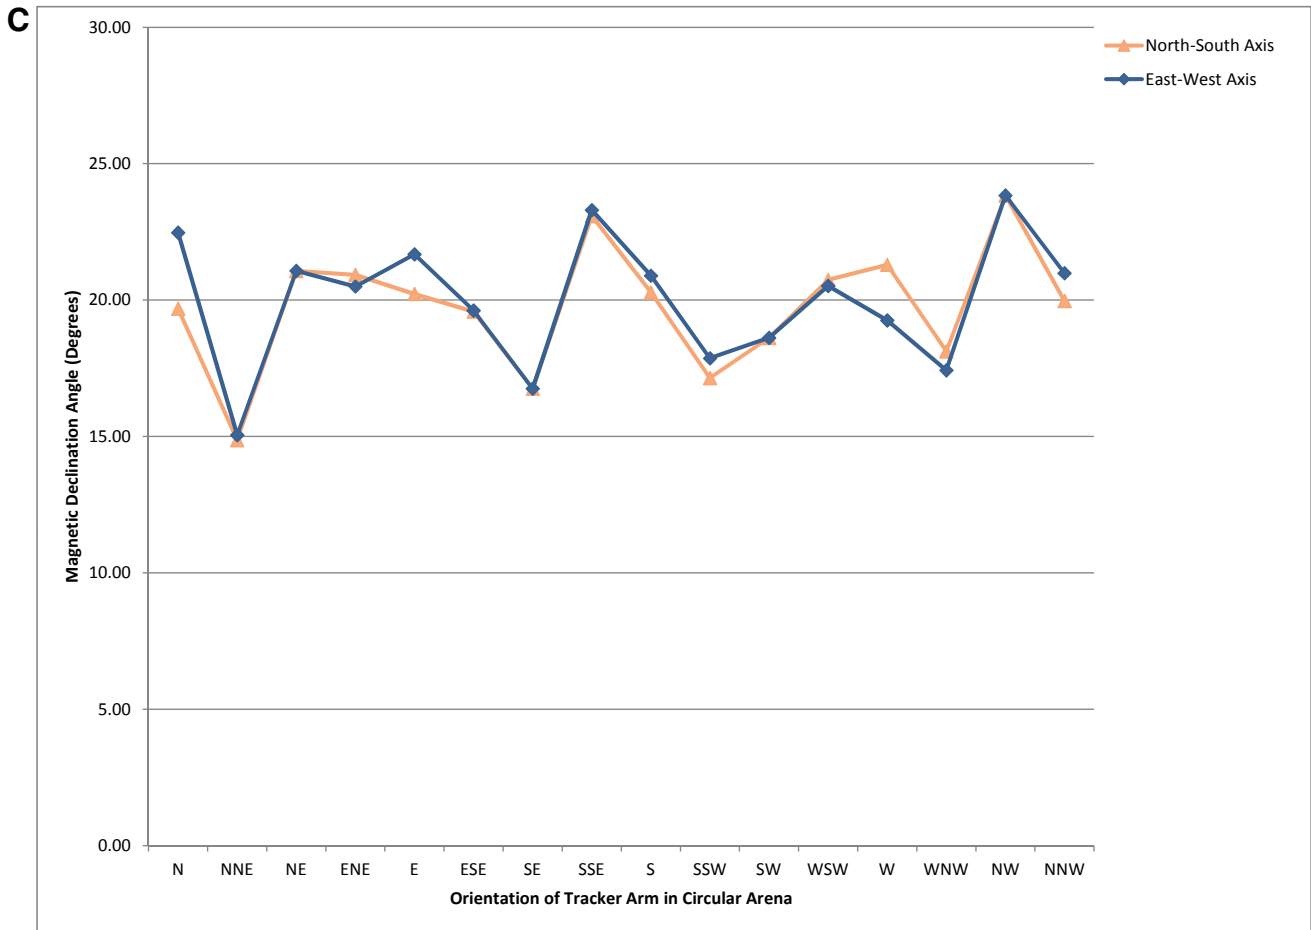

**Fig. S3. Total magnetic field experienced by pigeon at 16 locations around periphery of circular orientation arena during parallel (standard) sessions with a truncated magnetic inclination range.** Measurements taken as described for Fig. 1a. (a) Magnetic inclination angle. (b) Magnetic field intensity. (c) Magnetic declination angle.
